# Supplementary material for: Comparative analyses of fecal microbiota in Chinese isolated Yao population, minority Zhuang and rural Han by 16sRNA sequencing
Source: PubMed Central journal article supplement (PMC5773753; doi:10.1038/s41598-017-17851-8), 2018-01-18

**Comparative analyses of fecal microbiota in Chinese isolated Yao population, minority  
Zhuang and rural Han by 16sRNA sequencing**

Ming Liao<sup>1-4</sup>, Yuanliang Xie<sup>2-4</sup>, Yan Mao<sup>5</sup>, Zheng Lu<sup>2-4,6</sup>, Aihua Tan<sup>2-4</sup>, Chunlei Wu<sup>7</sup>, Zhifu Zhang<sup>8</sup>, Yang Chen<sup>2-3</sup>, Tianyu Li<sup>2-4,6</sup>, Yu Ye<sup>2-3,9</sup>, Ziting Yao<sup>2-4</sup>, Yonghua Jiang<sup>2-4</sup>, Hongzhe Li<sup>10</sup>, Xiaoming Li<sup>11</sup>, Xiaobo Yang<sup>2-4</sup>, Qiuyan Wang<sup>2-4</sup>, Zengnan Mo<sup>2-4</sup>

1. Department of Reproductive Center, The First Affiliated Hospital of Guangxi Medical University, Nanning, Guangxi 530021, China
2. Center for Genomic and Personalized Medicine, Guangxi Medical University, Nanning, Guangxi 530021, China.
3. Guangxi Collaborative Innovation Center for Genomic and Personalized Medicine, Nanning, Guangxi 530021, China.
4. Guangxi Key Laboratory of Genomic and Personalized Medicine, Nanning, Guangxi 530021, China.
5. Oncology Department, Nanning Second People's Hospital, the third Affiliated Hospital of Guangxi Medical University, Nanning, Guangxi, 530031, China
6. Institute of Urology and Nephrology, First Affiliated Hospital of Guangxi Medical University, Nanning, Guangxi 530021, China
7. Department of Urology, First Affiliated Hospital of Xinxiang Medical College, Xinxiang, Henan 453100, China
8. Urology Department, Minzu Hospital of Guangxi Zhuang Autonomous Region, Affiliated Minzu Hospital of Guangxi Medical University, Nanning, Guangxi 530001, China
9. Department of Emergency Surgery, the first Affiliated Hospital of Guangxi Medical University, Nanning, Guangxi 530021, China.
10. Department of Biostatistics and Epidemiology, Perelman School of Medicine, University of Pennsylvania, Philadelphia, PA 19014, USA
11. Hezhou University, Hezhou, Guangxi 542899, China.

Correspondence: Zengnan Mo, Institute of Urology and Nephrology, First Affiliated Hospital of Guangxi Medical University, NO.22 Shuangyong Road, 530021 Nanning, Guangxi Zhuang Autonomous Region, China. E-mail: [zengnanmo@hotmail.com](mailto:zengnanmo@hotmail.com)

**Figure 1S. The relationship between clean reads and OUT counts in the three ethnic groups.**

**Figure 2S. The other alpha-diversity and beta-diversity analysis in three ethnic groups.** (a) The Shannon index, PD\_whole\_tree and observed species at 4200 sequences per sample in the rarefaction curve; P was calculated from the analysis of variance. (b) The weighted Unifrac, Bray-curtis and Jensen-Shannon distance; P was calculated from the permutational multivariate analysis of variance.

**Figure 3S. The relative proportions of genus presence in the three ethnic groups.** (a) The pattern of the median proportions of genus presence. (b) The presence proportions of two significant genera; p was calculated from Fisher's exact test.

**Figure 4S. The LEfSe results by comparison of the Zhuang and Han groups.** (a) The linear discriminant analysis. (b) The cladograms report. Prefixes represent abbreviations for the taxonomic rank of each taxa: phylum (p\_\_), class (c\_\_), etc.

**Figure 5S. The importance and distribution of serum biomarkers in the three ethnic groups.** (a) The importance of each biomarker in random forest classification; \* indicates the significant biomarkers from the Kruskal-Wallis rank-sum test. (b) The distribution of the significant biomarkers in routine blood tests and liver function; p was calculated from the Kruskal-Wallis rank-sum test. The bars between the groups indicate  $p < 0.05$  after multiple comparisons following a significant Kruskal-Wallis test.

Figure. 1S

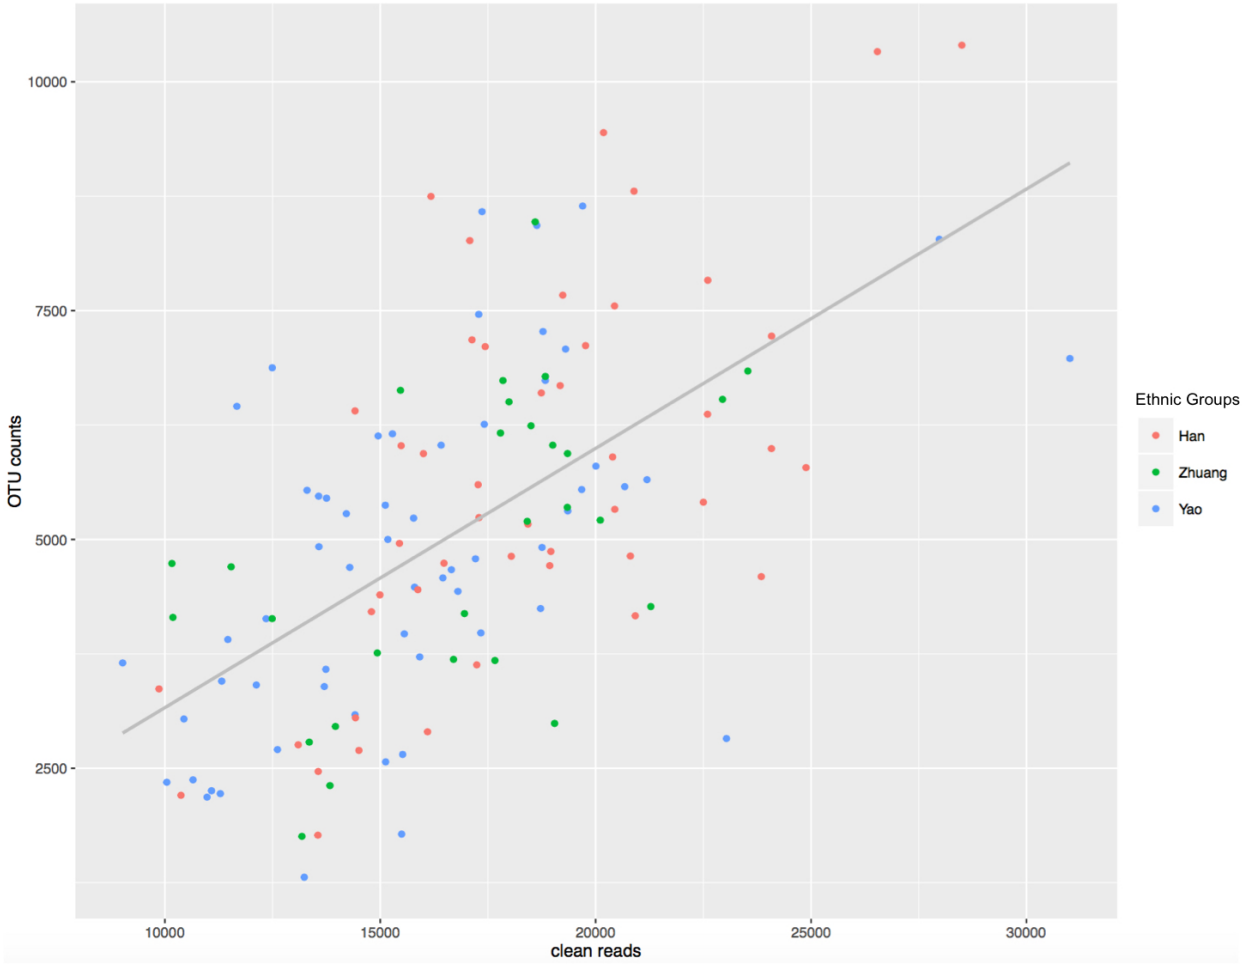

Figure. 2S

a.

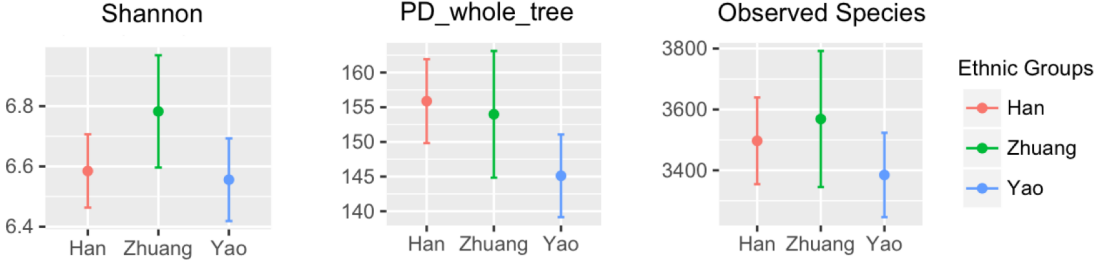

b.

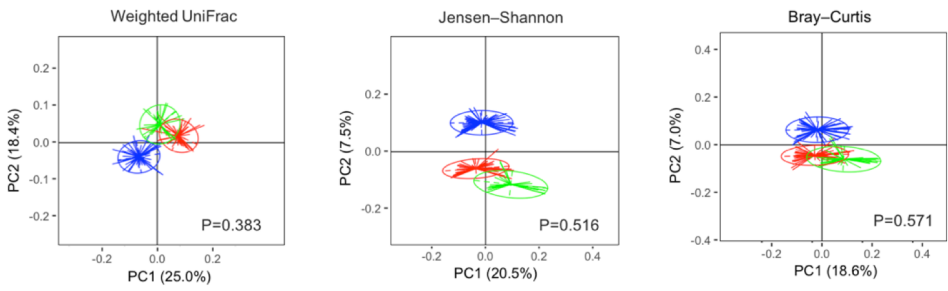

Figure. 3S

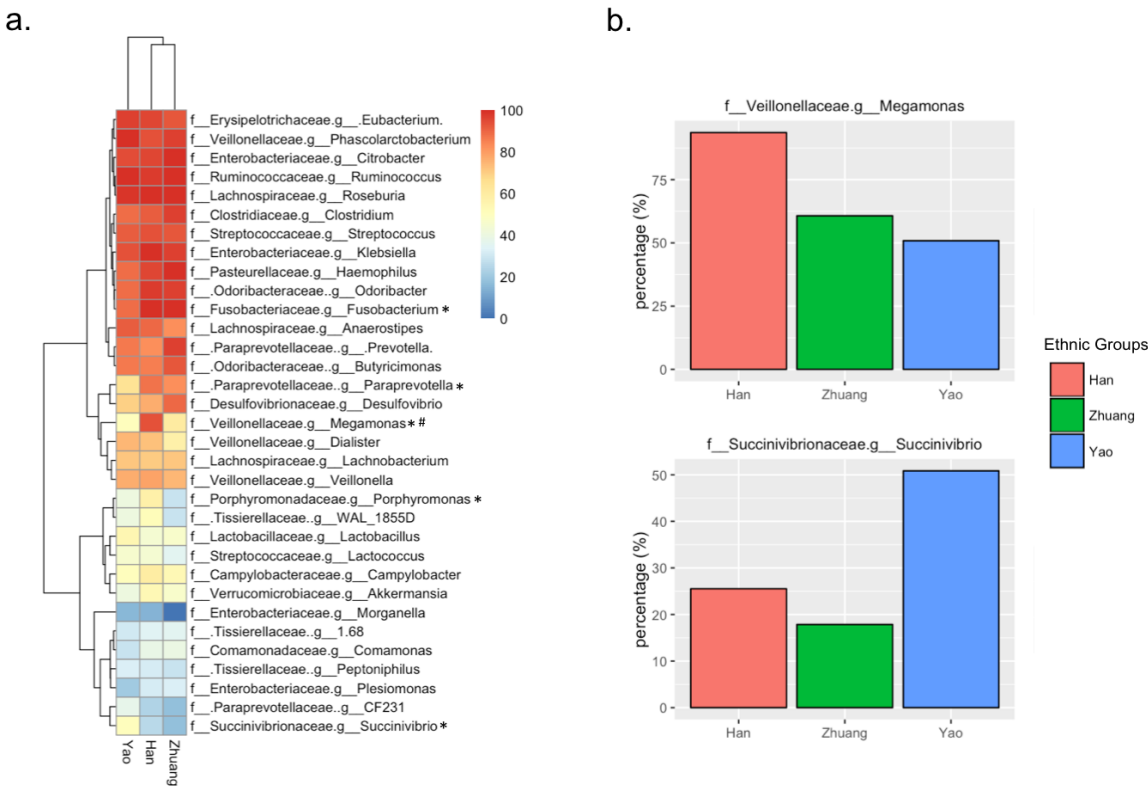

Figure. S4

a.

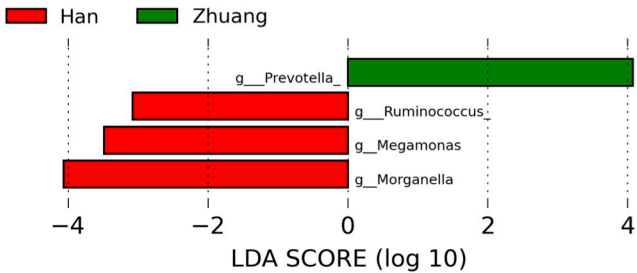

b.

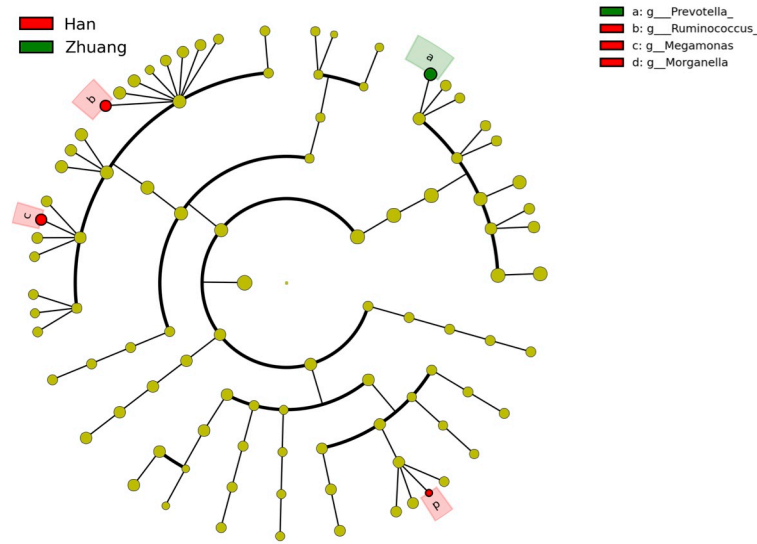

Figure. S5

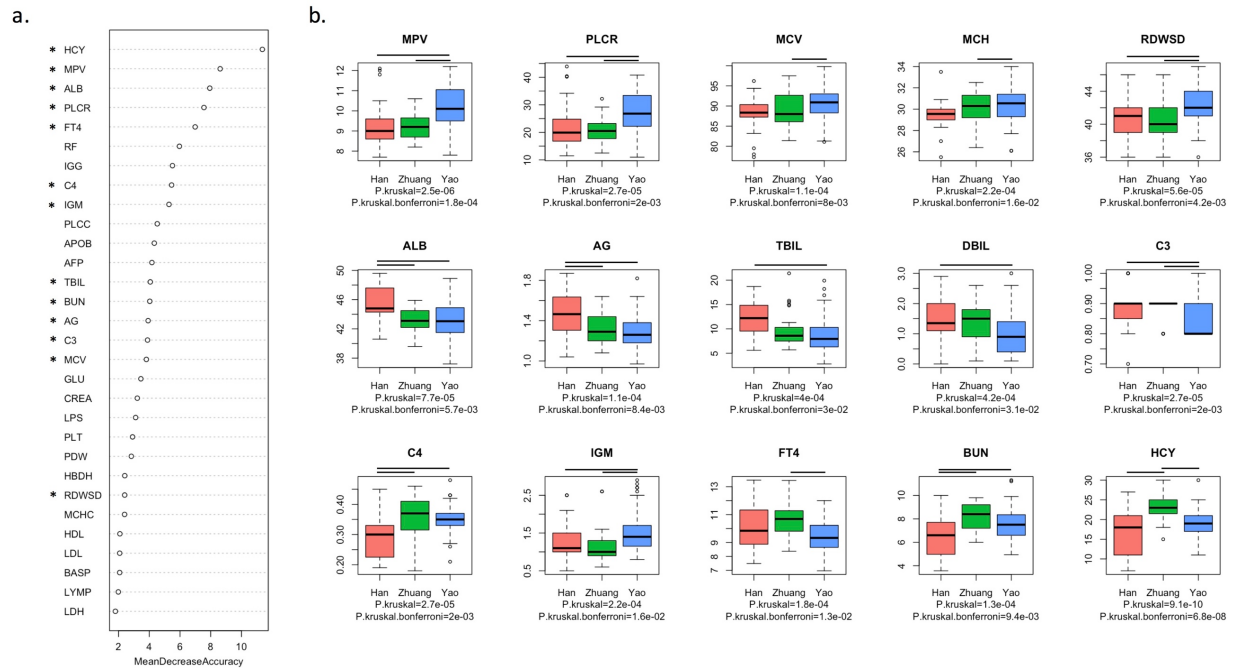

Supplement: 41598_2017_17851_MOESM1_ESM.pdf [file 41598_2017_17851_MOESM1_ESM.pdf]
